# Supplementary material for: A morphology controlled surface sulfurized CoMn2O4 microspike electrocatalyst for water splitting with excellent OER rate for binder-free electrocatalytic oxygen evolution
Source: Royal Society of Chemistry journal article supplement (doi:10.1039/d0ta09430g), 2021-01-01
Supplement: d0ta09430g1.pdf [file d0ta09430g1.pdf]

**Morphology controlled surface sulfurized CoMn<sub>2</sub>O<sub>4</sub> microspikes electrocatalyst for water splitting with excellent OER rate for binder-free electrocatalytic oxygen evolution**

Ali Bahadur<sup>1,2†\*</sup>, Waseem Hussain<sup>3†</sup>, Shahid Iqbal<sup>4†\*</sup>, Farman Ullah<sup>2</sup>, Muhammad Shoaib<sup>5</sup>, Guocong Liu<sup>4\*</sup>, Kejun Feng<sup>4</sup>

<sup>1</sup>*Department of Transdisciplinary Studies, Graduate School of Convergence Science and Technology, Seoul National University, Seoul, 08826, South Korea*

<sup>2</sup>*Department of Chemistry, Quaid-i-Azam University, Islamabad, 45320, Pakistan.*

<sup>3</sup>*Department of Physics, Quaid-i-Azam University, Islamabad, 45320, Pakistan.*

<sup>4</sup>*School of Chemistry and Materials Engineering, Huizhou University, Huizhou 516007, Guangdong China.*

<sup>5</sup>*Department of Chemistry, Government Postgraduate College Samanabad Faisalabad 38000, Pakistan.*

***\*To whom correspondence should be addressed***

shahidiqbal@hzu.edu.cn (Shahid Iqbal) and gcl\_109@163.com (Guocong Liu),  
alibahadur138@snu.ac.kr (Ali Bahadur)

† Authors have equal contribution

**Table S1** OER activity comparison with previously reported CoMn<sub>2</sub>O<sub>4</sub> based electrocatalysts.

| <b>Electrocatalyst</b>                                                                           | <b>Synthesis route</b>            | <b>Electrolyte concentration (KOH)</b> | <b>Catalyst Loading (mg cm<sup>-2</sup>)</b> | <b>Potential mV @ 10 mA cm<sup>-2</sup> (vs. RHE)</b> | <b>Tafel slope (mV dec<sup>-1</sup>)</b> | <b>Reference</b> |
|--------------------------------------------------------------------------------------------------|-----------------------------------|----------------------------------------|----------------------------------------------|-------------------------------------------------------|------------------------------------------|------------------|
| <b>10S-CoMn<sub>2</sub>O<sub>4</sub>/FTO</b>                                                     | <b>Electrodeposition</b>          | <b>0.1 M</b>                           | <b>0.3</b>                                   | <b>300</b>                                            | <b>26.28</b>                             | <b>This work</b> |
| <b>CoMn<sub>2</sub>O<sub>4</sub>/FTO</b>                                                         | <b>Electrodeposition</b>          | <b>0.1 M</b>                           | <b>0.3</b>                                   | <b>310</b>                                            | <b>93.45</b>                             | <b>This work</b> |
| CoMn <sub>2</sub> O <sub>4</sub> nanodots/rGO                                                    | Hot injection & Heating up method | 0.1 M                                  | 0.319                                        | 310                                                   | 56                                       | [1]              |
| Mn <sub>3</sub> O <sub>4</sub> @CoMn <sub>2</sub> O <sub>4</sub> -Co <sub>x</sub> O <sub>y</sub> | One-pot two-step method           | 0.1 M                                  | 275                                          | 310                                                   | 81                                       | [2]              |
| Mn <sub>x</sub> Co <sub>3-x</sub> O <sub>4</sub> Spinel oxides                                   | Sol-gel method                    | 1 M                                    | 1.3                                          | 327                                                   | 79                                       | [3]              |
| CoMn <sub>2</sub> O <sub>4</sub> /N doped porous carbon                                          | Solvothermal                      | 0.1 M                                  | 0.33                                         | 570                                                   | Not given                                | [4]              |

**Table S2** OER activity comparison with recently reported (2020) oxides based electrocatalysts.

| <b>Electrocatalyst</b>                                                                              | <b>Electrolyte concentration (KOH)</b> | <b>Catalyst Loading (mg cm<sup>-2</sup>)</b> | <b>Potential mV @ 10 mA cm<sup>-2</sup> (vs. RHE)</b> | <b>Tafel slope (mV dec<sup>-1</sup>)</b> | <b>Reference</b> |
|-----------------------------------------------------------------------------------------------------|----------------------------------------|----------------------------------------------|-------------------------------------------------------|------------------------------------------|------------------|
| <b>10S-CoMn<sub>2</sub>O<sub>4</sub>/FTO</b>                                                        | <b>0.1 M</b>                           | <b>0.3</b>                                   | <b>300</b>                                            | <b>26.28</b>                             | <b>This work</b> |
| <b>CoMn<sub>2</sub>O<sub>4</sub>/FTO</b>                                                            | <b>0.1 M</b>                           | <b>0.3</b>                                   | <b>310</b>                                            | <b>93.45</b>                             | <b>This work</b> |
| Ba <sub>4</sub> Sr <sub>4</sub> (Co <sub>0.8</sub> Fe <sub>0.2</sub> ) <sub>4</sub> O <sub>15</sub> | 0.1 M                                  | 0.232                                        | 340                                                   | 47                                       | [5]              |
| Mixed Ni-Co-Mn oxides                                                                               | 1 M                                    | 0.12                                         | 400                                                   | 74                                       | [6]              |
| Defect-rich Cobalt oxide                                                                            | 1 M                                    | 0.12                                         | 369                                                   | 46                                       | [7]              |
| Co <sub>3</sub> O <sub>4</sub> /MnCO <sub>3</sub>                                                   | 1 M                                    | Not given                                    | 273                                                   | 62.06                                    | [8]              |
| LiNi <sub>0.5</sub> Co <sub>0.2</sub> Mn <sub>0.3</sub> O <sub>2</sub>                              | 0.1 M                                  | 0.26                                         | ~480                                                  | 51.9                                     | [9]              |
| Mn-CoO@Fe(OH) <sub>3</sub> /NF                                                                      | 1 M                                    | Not given                                    | 195                                                   | 49                                       | [10]             |
| Co <sub>a</sub> Fe <sub>b</sub> V <sub>c</sub> O <sub>x</sub>                                       | 1 M                                    | 0.2                                          | 249                                                   | 41                                       | [11]             |
| Co-Fe oxides/carbon paper                                                                           | 1 M                                    | Not given                                    | 460                                                   | 105                                      | [12]             |
| Cobalt Iron oxide nanowires                                                                         | 1 M                                    | 0.12                                         | 378                                                   | 54                                       | [13]             |
| Fe <sub>0.5</sub> Co <sub>0.5</sub> MoO <sub>4-x</sub> S <sub>x</sub> nanoflowers                   | 1 M                                    | Not given                                    | 263                                                   | 87                                       | [14]             |
| La-doped CoO <sub>x</sub> NSs                                                                       | 0.1 M                                  | Not given                                    | 353                                                   | 78.2                                     | [15]             |

## Supplementary Note: 1

Electrocatalytic activity surface area (ECSA) estimation:

ECSA was estimated by equation:  $ECSA = C_{dl}/C_s$ , where  $C_s$  denotes specific capacitance of 1  $\text{cm}^2$  of real surface (assumed to be 0.4  $\text{mF}/\text{cm}^2$  in this study) while  $C_{dl}$  denotes double-layer capacitance. Cyclic voltammetry was performed at different scan rates (1, 2, 3, 4, 5, 6, 7, 8, 9, and 10  $\text{mV}/\text{s}$ ) in the non-Faradaic region (1.015 -1.065 vs. RHE). ECSA was estimated directly from  $C_{dl}$  by plotting  $\Delta j$  ( $\Delta j = j_a - j_c$ ) as a function of scan rate.

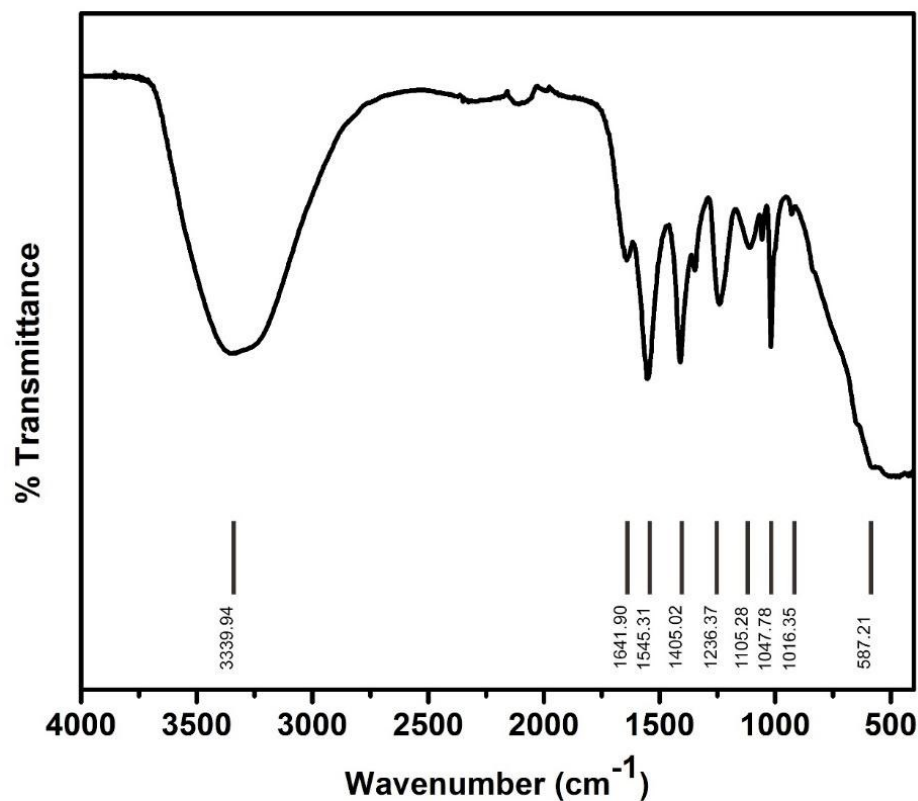

**Figure S1** FTIR spectra of synthesized CoMn<sub>2</sub>O<sub>4</sub>@FTO substrate.

FTIR spectra displayed absorption bands around 3700 -2690 and 1641 cm<sup>-1</sup>, attributed to the stretching vibrations of OH and the bending vibrations of H-O-H from water molecules on the surface and this is consistent with the published data.[16] Importantly, the characteristic peak above 500 cm<sup>-1</sup> and at 1105.28 cm<sup>-1</sup> confirm the spinel structure of the product. Moreover, the absorption band appearing at 401 cm<sup>-1</sup> can be ascribed to the vibration of Co-O-Mn.[17]

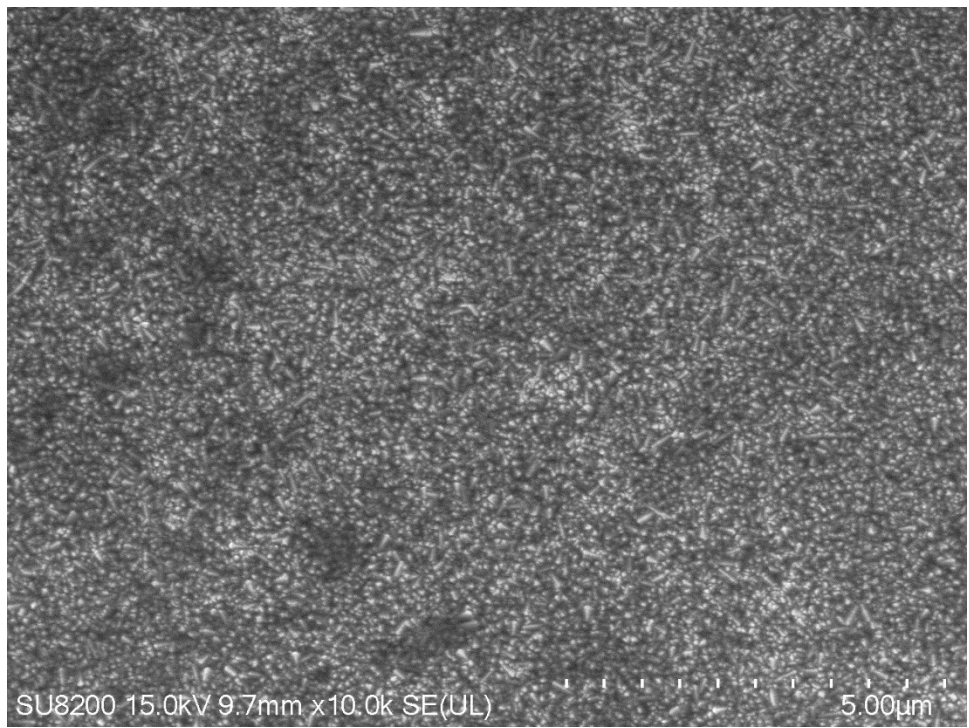

**Figure S2** SEM micrographs of Bare FTO.

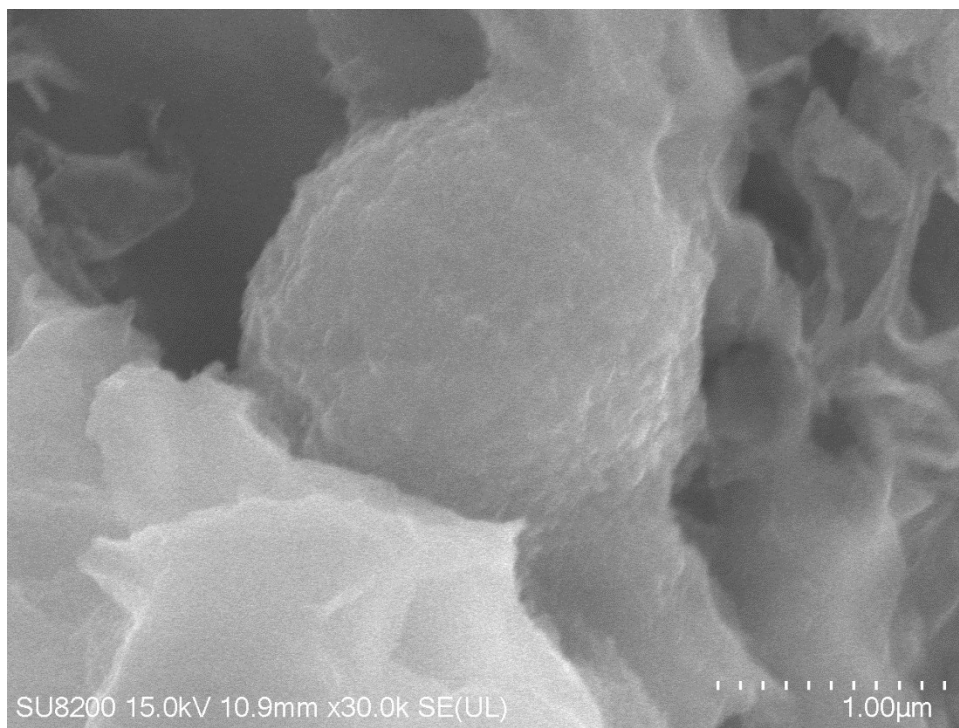

**Figure S3** High magnification SEM image of  $\text{Co}_3\text{O}_4@$ FTO.

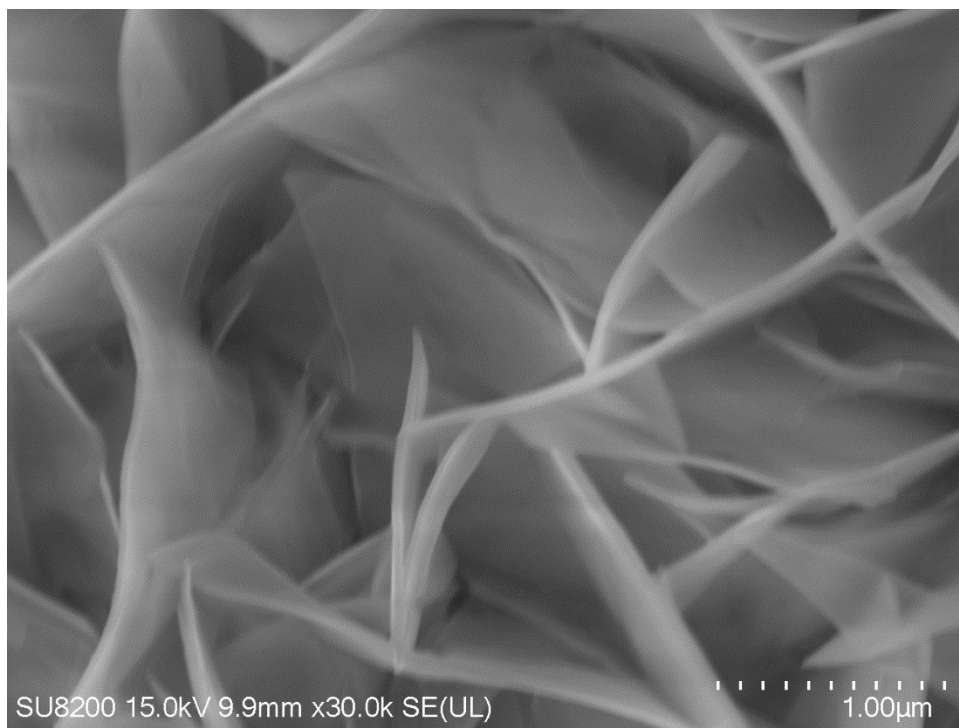

**Figure S4** High magnification SEM image of  $\text{Mn}_3\text{O}_4@\text{FTO}$ .



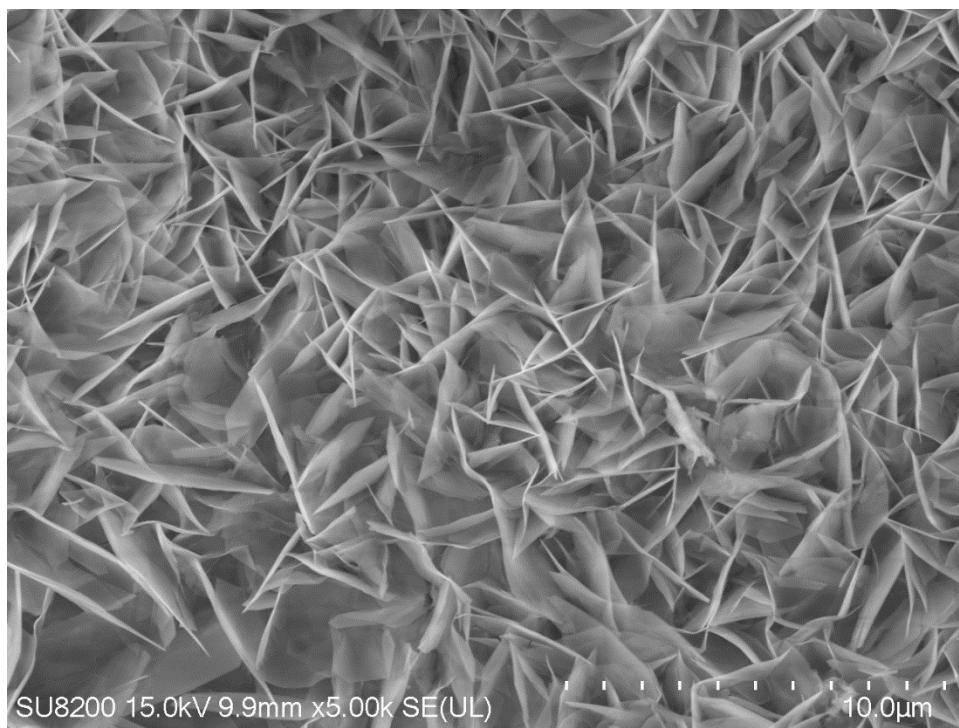

**Figure S5** High magnification SEM image of Mn<sub>3</sub>O<sub>4</sub>@FTO.

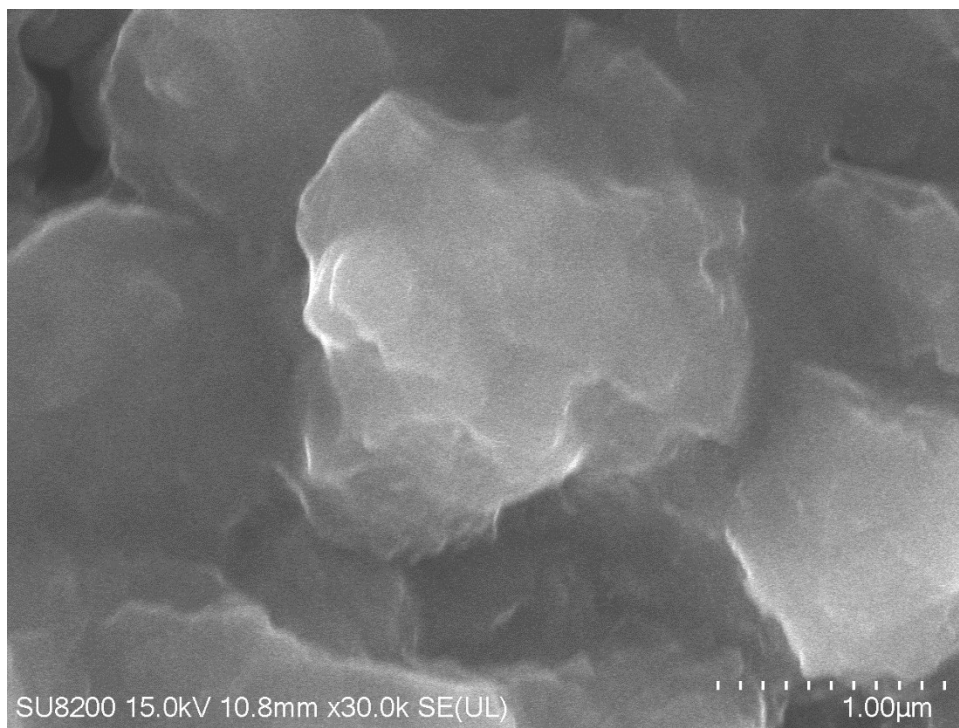

**Figure S6** High magnification SEM image of CoMn<sub>2</sub>O<sub>4</sub>@FTO.

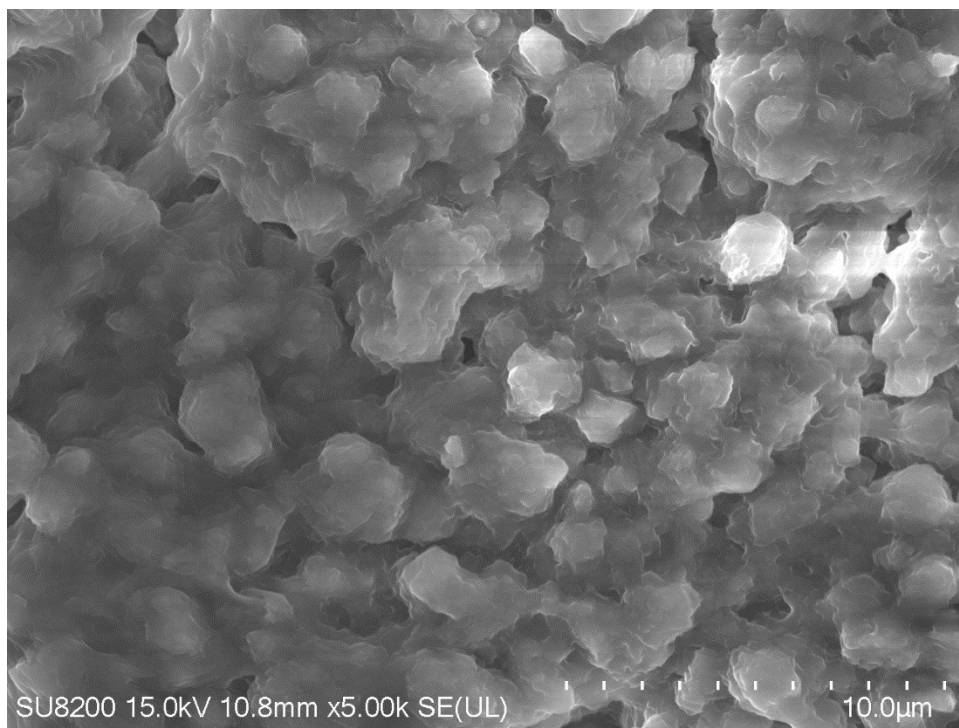

**Figure S7** Low magnification SEM image of CoMn<sub>2</sub>O<sub>4</sub>@FTO.

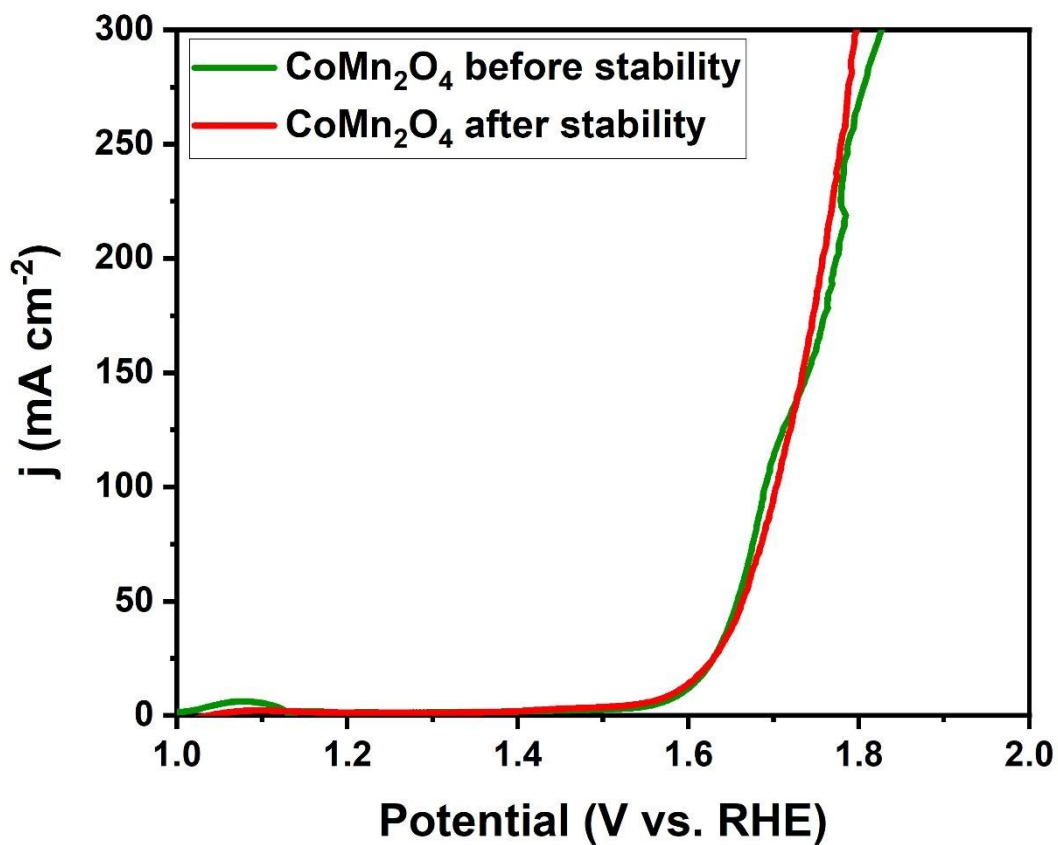

**Figure S8** OER activity comparison of CoMn<sub>2</sub>O<sub>4</sub>@FTO before and after stability (24 h at 20 mA cm<sup>-2</sup>) in 0.1 M KOH solution.

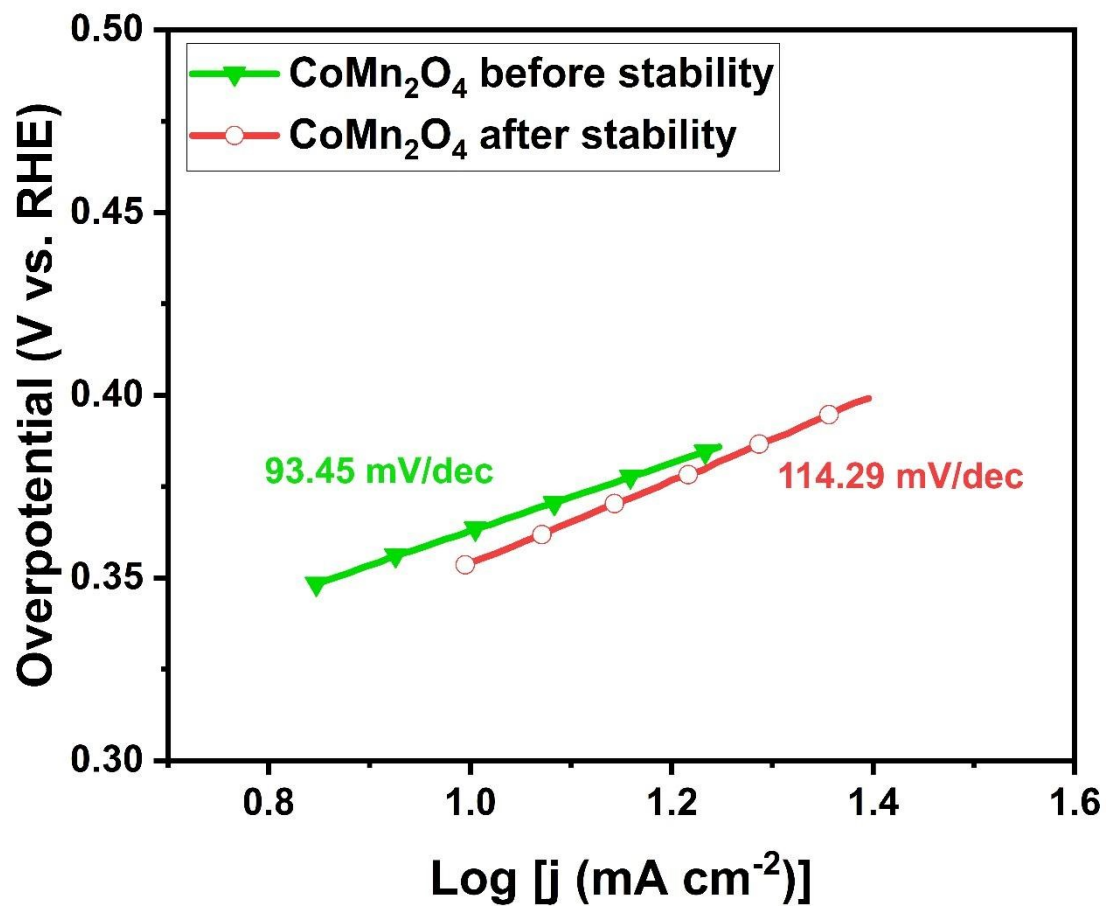

**Figure S9** Tafel slopes for CoMn<sub>2</sub>O<sub>4</sub>@FTO before and after 24 h stability test in 0.1 M KOH solution.

**Table S3** Electrocatalytic OER performance for electrodeposited material at FTO substrate at higher current density values.

| <b>Sample</b>                    | <b>E(mV)<br/>vs. RHE at<br/>20 mA cm<sup>-2</sup></b> | <b>E(mV)<br/>vs. RHE at<br/>50 mA cm<sup>-2</sup></b> | <b>E(mV)<br/>vs. RHE at<br/>100 mA cm<sup>-2</sup></b> |
|----------------------------------|-------------------------------------------------------|-------------------------------------------------------|--------------------------------------------------------|
| CoMn <sub>2</sub> O <sub>4</sub> | 380                                                   | 420                                                   | 450                                                    |
| Co <sub>2</sub> MnO <sub>4</sub> | 370                                                   | 480                                                   | 620                                                    |
| Co <sub>3</sub> O <sub>4</sub>   | 530                                                   | 880                                                   | 1200                                                   |
| Mn <sub>3</sub> O <sub>4</sub>   | 650                                                   | 760                                                   | 880                                                    |

**Table S4** Electrochemical impedance spectroscopy (EIS) parameters.

| <b>Sample</b>                    | <b>Solution resistance<br/>(<math>R_s</math>) / <math>\Omega</math></b> | <b>Charge transfer<br/>resistance (<math>R_{ct}</math>) / <math>\Omega</math></b> |
|----------------------------------|-------------------------------------------------------------------------|-----------------------------------------------------------------------------------|
| Co <sub>3</sub> O <sub>4</sub>   | 18.88                                                                   | 15.43                                                                             |
| Mn <sub>3</sub> O <sub>4</sub>   | 15.63                                                                   | 14.29                                                                             |
| Co <sub>2</sub> MnO <sub>4</sub> | 14.22                                                                   | 9.84                                                                              |
| CoMn <sub>2</sub> O <sub>4</sub> | 12.12                                                                   | 5.51                                                                              |

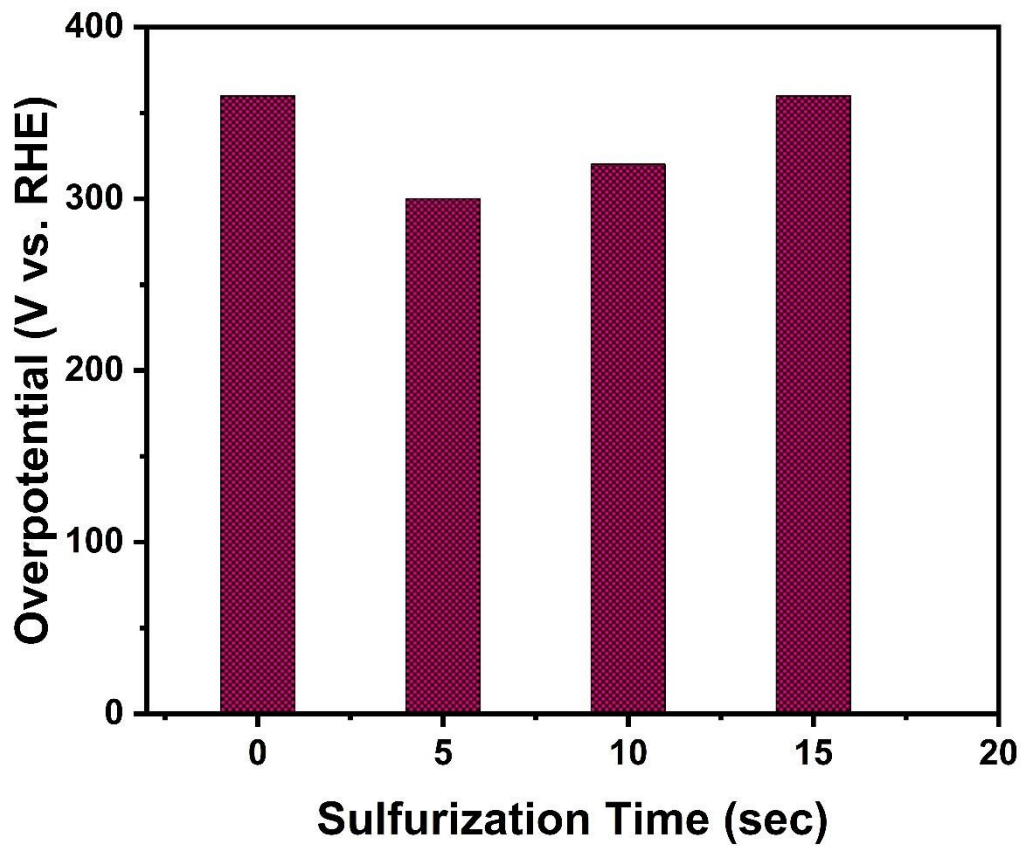

**Figure S10** Comparison of overpotential (at  $10 \text{ mA cm}^{-2}$ ) with varying sulfurization time.



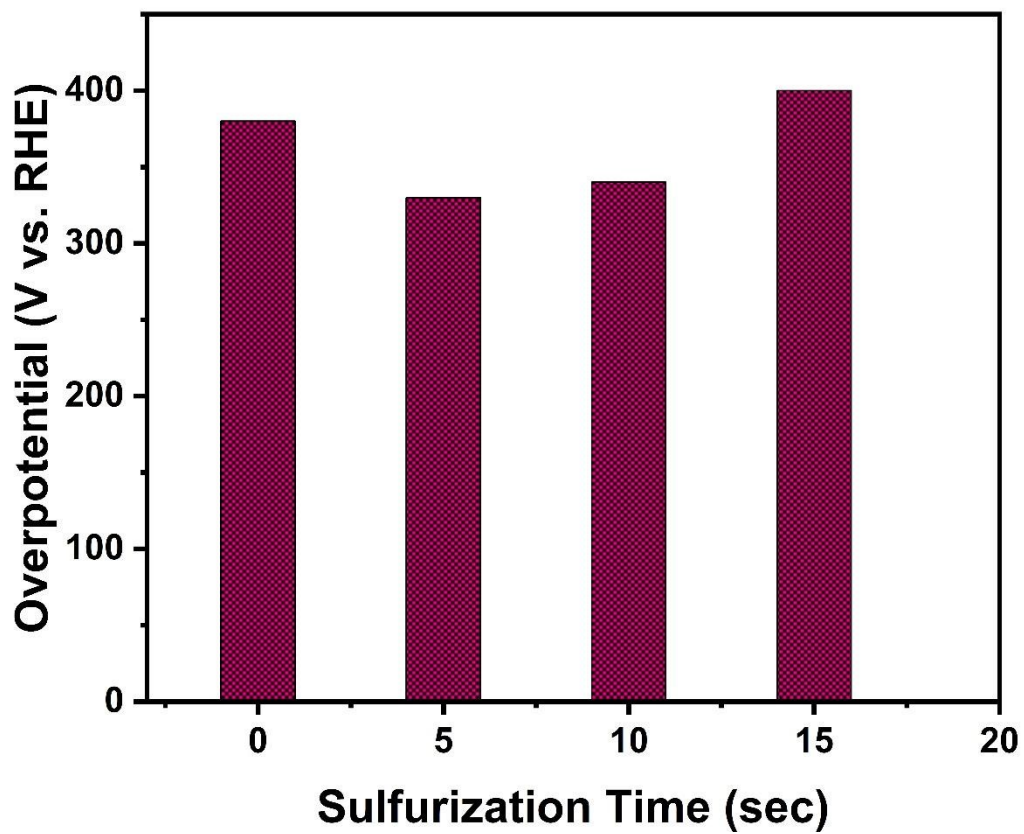

Figure S11 Comparison of overpotential (at 20 mA cm<sup>-2</sup>) with varying sulfurization time.

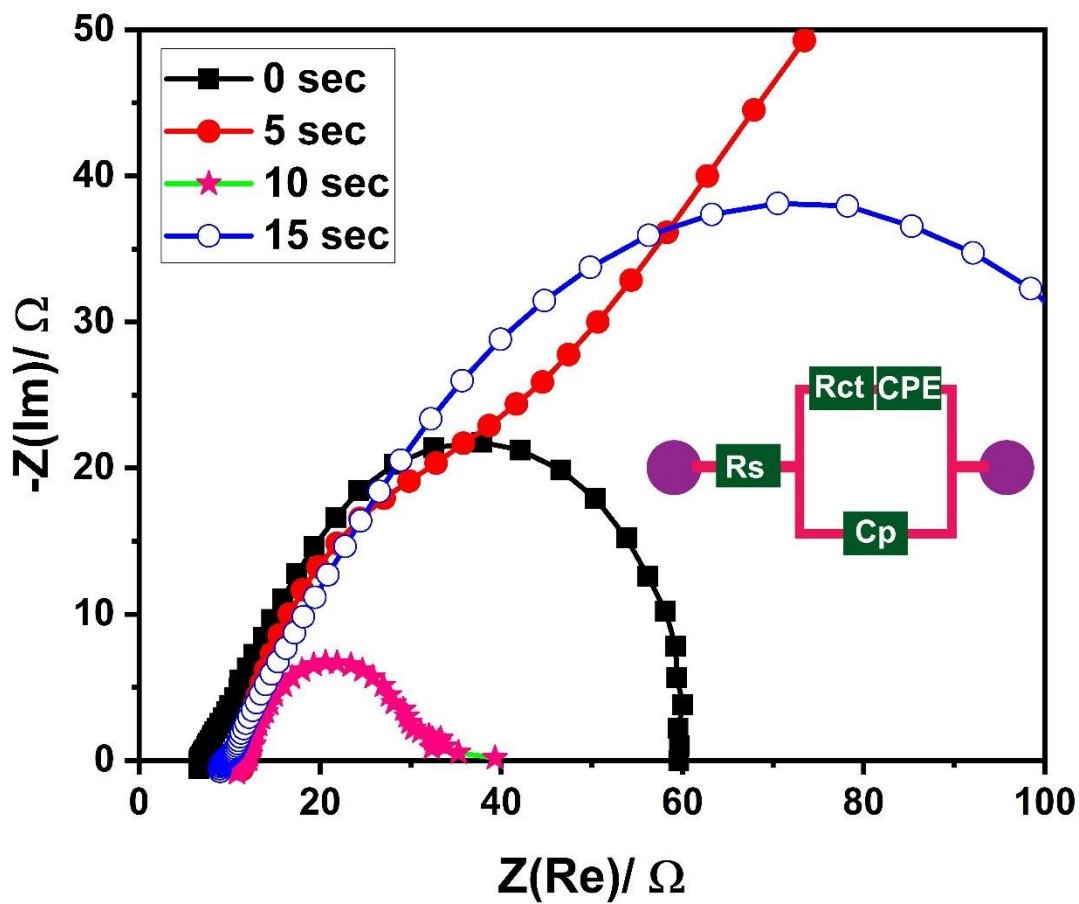

**Figure S12** Nyquist plot of S-CoMn<sub>2</sub>O<sub>4</sub>@FTO with different sulfurization times (inset shows the circuit diagram).

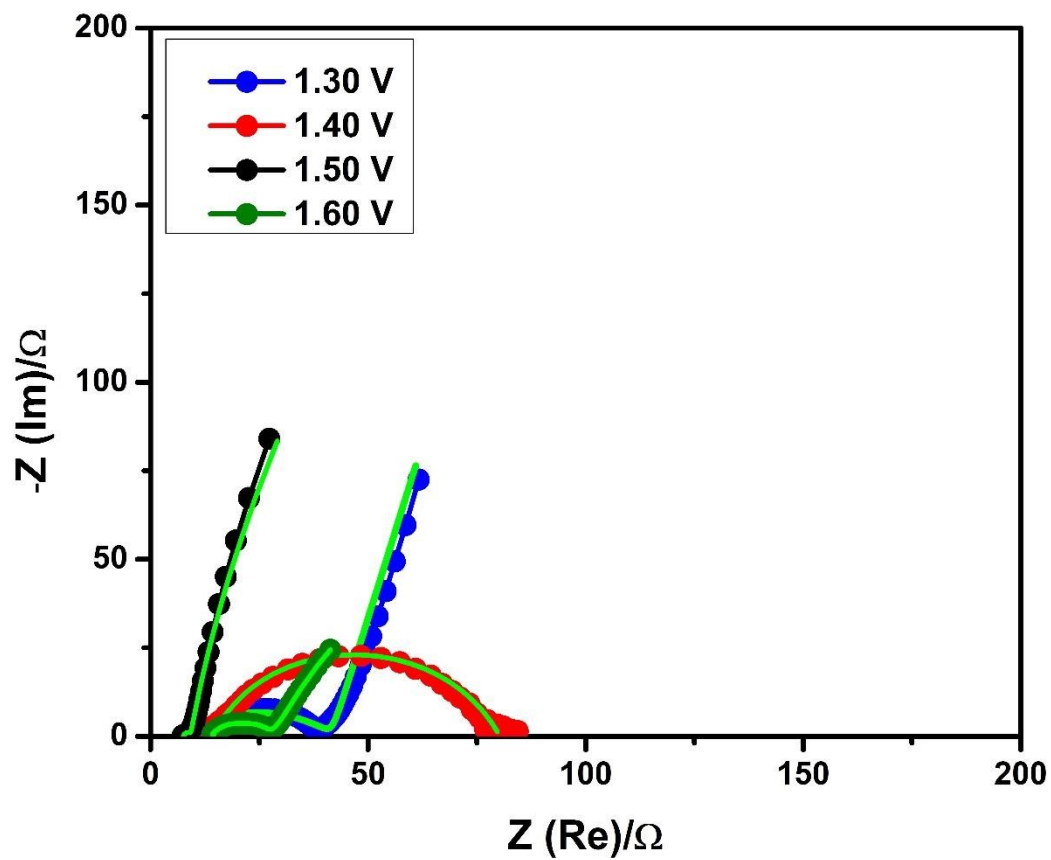

**Figure S13** Nyquist plot of S-CoMn<sub>2</sub>O<sub>4</sub>@FTO at different biases (inset shows the circuit diagram).

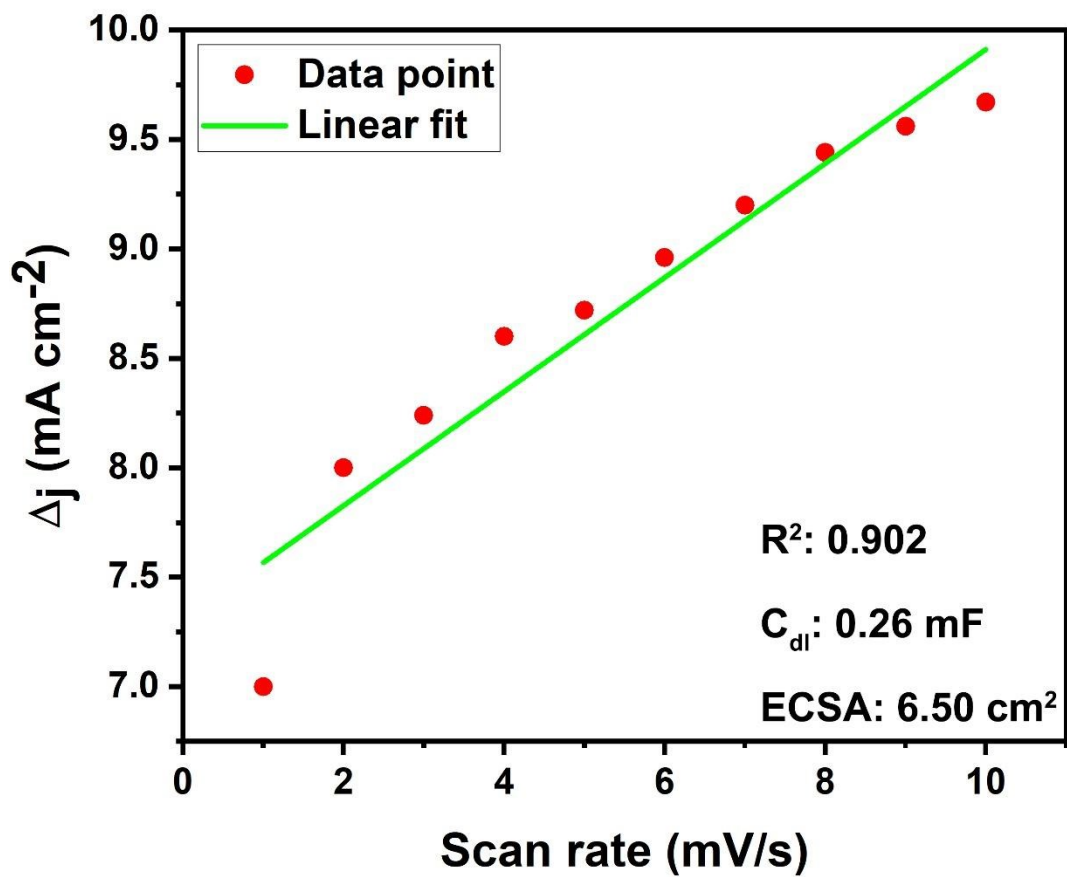

**Figure S14** Double-layer capacitance ( $C_{dl}$ ) and electrochemical surface area calculation by plotting  $\Delta j$  ( $j_a - j_c$ ) as a function of scan rate.

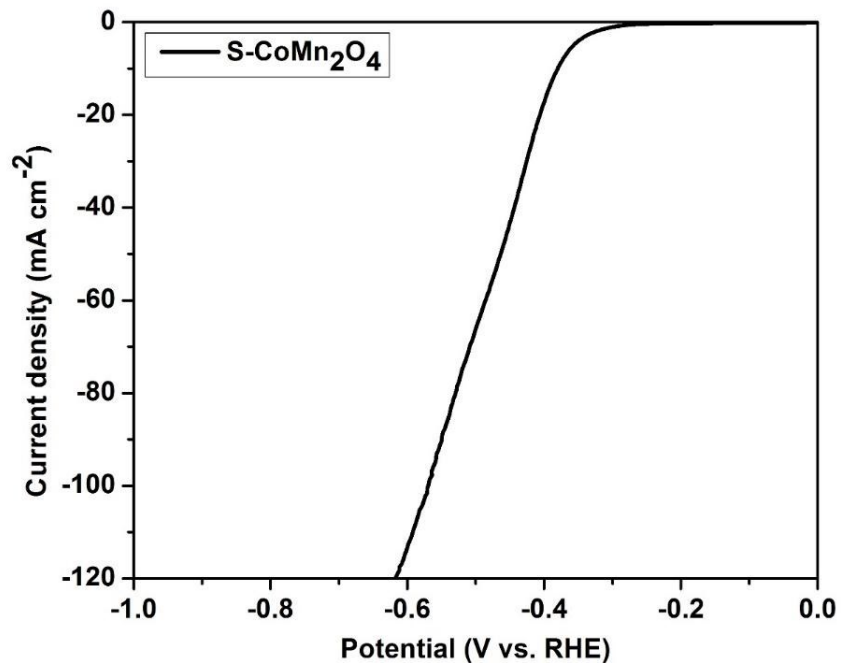

**Figure S15** HER activity of S-CoMn<sub>2</sub>O<sub>4</sub>-MFs@FTO in 0.5 M H<sub>2</sub>SO<sub>4</sub> solution.

Electrodeposited material (S-CoMn<sub>2</sub>O<sub>4</sub>-MFs@FTO) was also tested for hydrogen evolution reaction (HER) and the synthesized material showed no or very little HER activity with an overpotential of 380 and 403 mV at 10 mA cm<sup>-2</sup>, respectively.

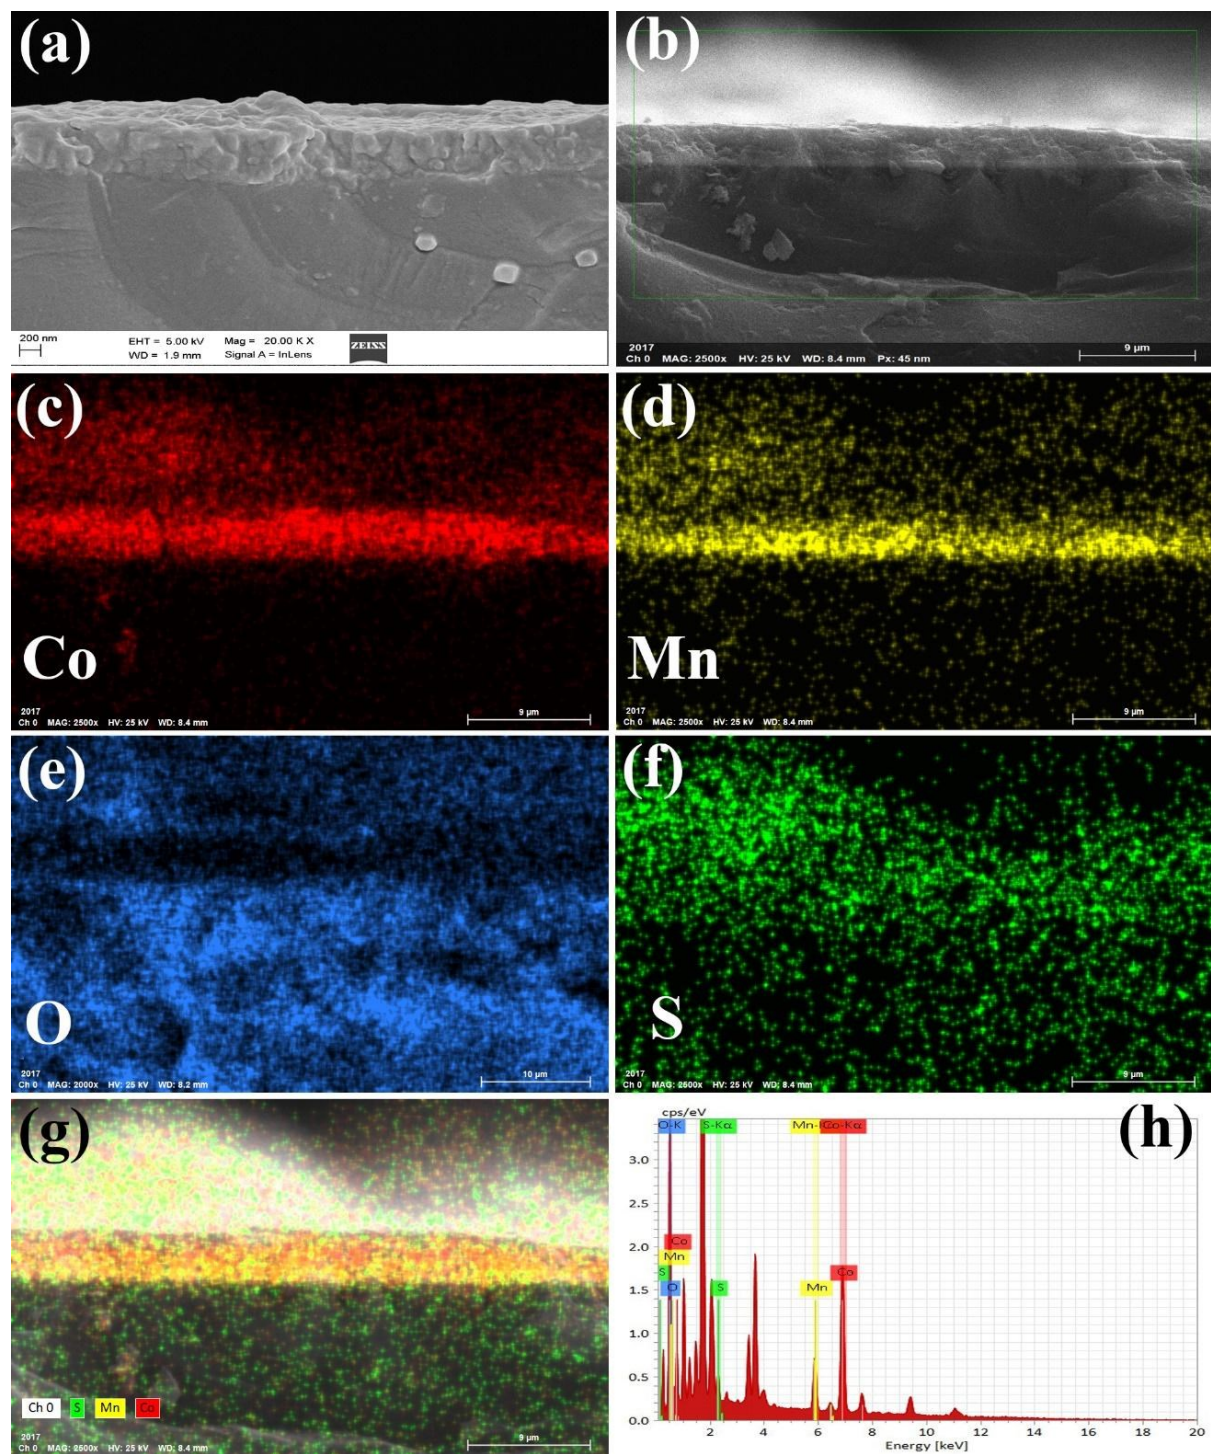

**Figure S16** Cross-sectional SEM images of surface sulfurized  $\text{CoMn}_2\text{O}_4$  microspikes (a). STEM image (b) of surface sulfurized  $\text{CoMn}_2\text{O}_4$  microspikes and elemental mapping of (c) Co; (d) Mn; (e) O; (f) S and (g) combine mapping. (h) EDX of surface sulfurized  $\text{CoMn}_2\text{O}_4$  microspikes.

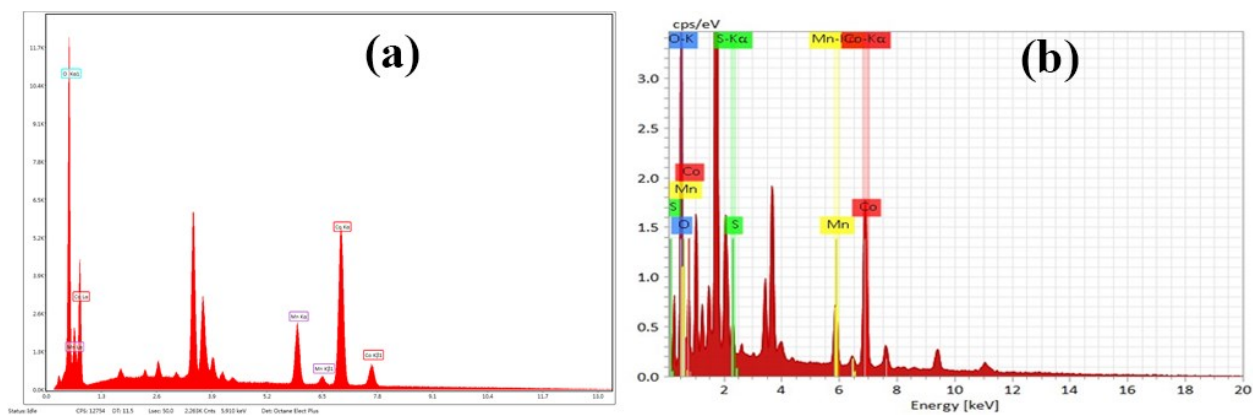

**Figure S17** EDX data of CoMn<sub>2</sub>O<sub>4</sub> microspikes before (a) and after sulfurization (b).

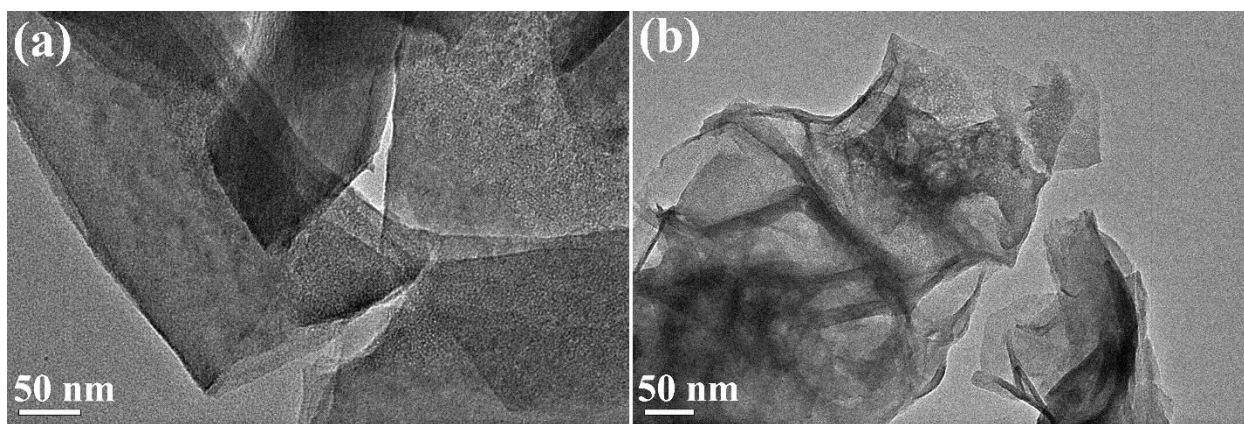

**Figure S18** HRTEM images of surface sulfurized CoMn<sub>2</sub>O<sub>4</sub> microspikes (a) before (b) and after electrocatalysis reaction .

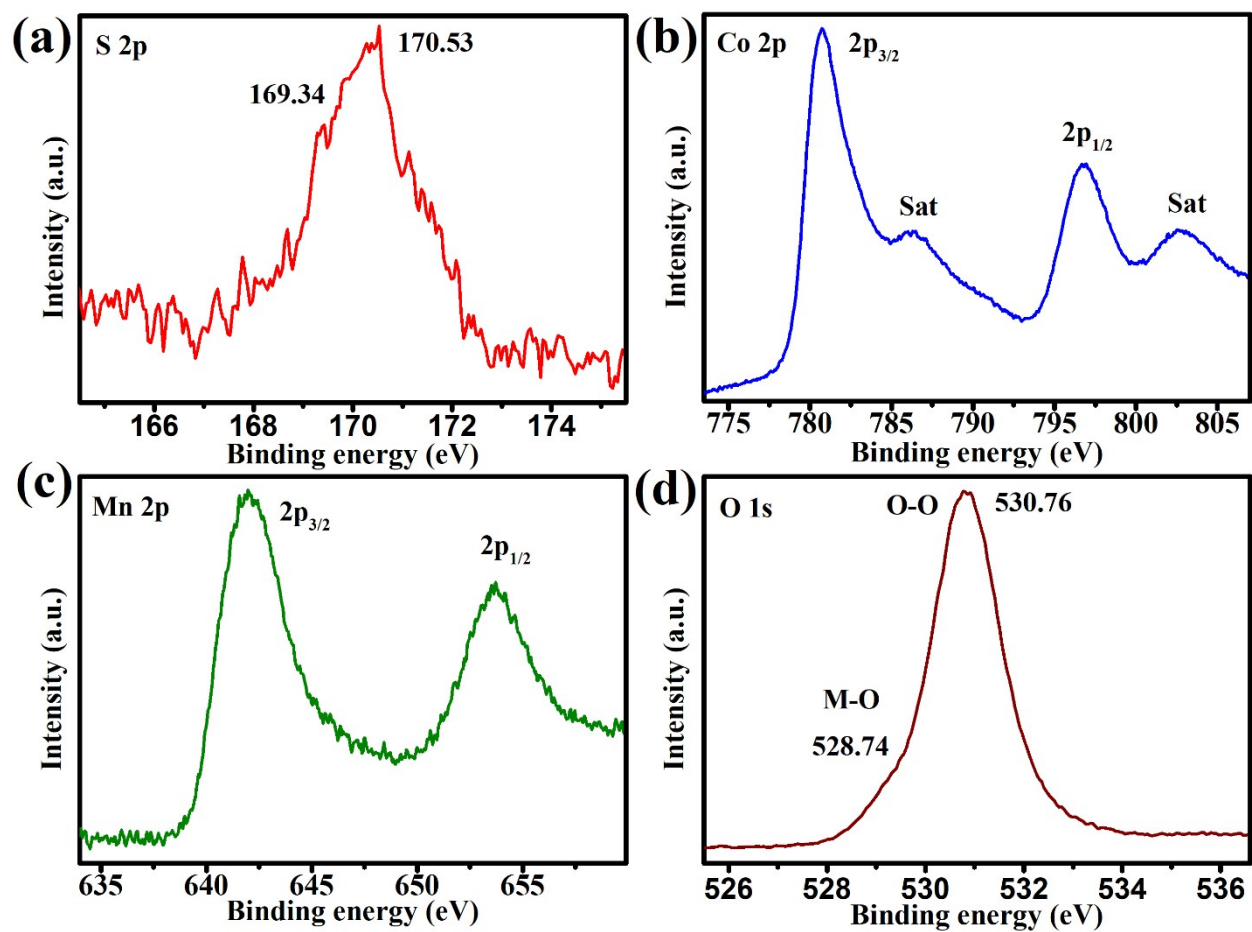

**Figure S19** High-resolution XPS spectra of surface sulfurized  $\text{CoMn}_2\text{O}_4$  microspikes after electrocatalysis reaction. (a) S 2p; (b) Co 2p; (c) Mn 2p; (d) O 1s.



**Table S5** XPS data of surface sulfurized  $\text{CoMn}_2\text{O}_4$  microspikes and actual values of peak area of XPS fitting results.

| Sr. No. | Name        | Start BE | Peak BE | End BE | Height CPS | FWHM eV | Area (P) CPS. eV | Area (N) TPP-2M | Atomic % |
|---------|-------------|----------|---------|--------|------------|---------|------------------|-----------------|----------|
| 1       | C 1s        | 297.96   | 284.8   | 279.06 | 22467.07   | 1.39    | 36508.33         | 511.93          | 24.24    |
| 2       | C 1s Scan A | 297.96   | 288.58  | 279.06 | 4150.89    | 1.39    | 6745.07          | 94.81           | 4.49     |
| 3       | C 1s Scan B | 297.96   | 286.38  | 279.06 | 3113.88    | 1.39    | 5059.97          | 71.02           | 3.36     |
| 4       | O 1s        | 544.86   | 531.2   | 525.93 | 81060.53   | 1.73    | 170677.21        | 989.59          | 46.85    |
| 5       | Co 2p       | 811.96   | 780.84  | 771.06 | 26578.41   | 3.49    | 211591.87        | 242.77          | 11.49    |
| 6       | Mn 2p       | 659.96   | 641.52  | 632.06 | 18688.56   | 3.47    | 106919.91        | 158.51          | 7.5      |
| 7       | S 2p        | 174.96   | 168.16  | 157.06 | 1478.75    | 2.09    | 6293.72          | 43.68           | 2.07     |

## REFERENCES

- [1] J. Du, C. Chen, F. Cheng, J. Chen, Rapid synthesis and efficient electrocatalytic oxygen reduction/evolution reaction of  $\text{CoMn}_2\text{O}_4$  nanodots supported on graphene, *Inorg. Chem.* (2015). <https://doi.org/10.1021/acs.inorgchem.5b00518>.
- [2] Z. Luo, E. Irtem, M. Ibáñez, R. Nafria, S. Martí-Sánchez, A. Genç, M. De La Mata, Y. Liu, D. Cadavid, J. Llorca, J. Arbiol, T. Andreu, J.R. Morante, A. Cabot,  $\text{Mn}_3\text{O}_4@ \text{CoMn}_2\text{O}_4\text{-Co}_x\text{O}_y$  nanoparticles: Partial cation exchange synthesis and electrocatalytic properties toward the oxygen reduction and evolution reactions, *ACS Appl. Mater. Interfaces.* (2016). <https://doi.org/10.1021/acsami.6b02786>.

- [3] K. Lankauf, K. Cysewska, J. Karczewski, A. Mielewczyk-Gryń, K. Górnicka, G. Cempura, M. Chen, P. Jasiński, S. Molin,  $Mn_xCo_{3-x}O_4$  spinel oxides as efficient oxygen evolution reaction catalysts in alkaline media, *Int. J. Hydrogen Energy*. (2020). <https://doi.org/10.1016/j.ijhydene.2020.03.188>.
- [4] J.L. Digol, M.F.M. Labata, M.F. Divinagracia, J.D. Ocon,  $CoMn_2O_4$  anchored on N-doped high-dimensional hierarchical porous carbon derived from biomass for bifunctional oxygen electrocatalysis, *ECS Trans.* (2017). <https://doi.org/10.1149/07711.0525ecst>.
- [5] Y. Zhu, H.A. Tahini, Z. Hu, Z.G. Chen, W. Zhou, A.C. Komarek, Q. Lin, H.J. Lin, C. Te Chen, Y. Zhong, M.T. Fernández-Díaz, S.C. Smith, H. Wang, M. Liu, Z. Shao, Boosting oxygen evolution reaction by creating both metal ion and lattice-oxygen active sites in a complex oxide, *Adv. Mater.* (2020). <https://doi.org/10.1002/adma.201905025>.
- [6] T. Priamushko, R. Guillet-Nicolas, M. Yu, M. Doyle, C. Weidenthaler, H. Tuysüz, F. Kleitz, Nanocast Mixed Ni-Co-Mn oxides with controlled surface and pore structure for electrochemical oxygen evolution reaction, *ACS Appl. Energy Mater.* (2020). <https://doi.org/10.1021/acsaem.0c00544>.
- [7] M. Yu, F. Waag, C.K. Chan, C. Weidenthaler, S. Barcikowski, H. Tuysüz, Laser Fragmentation-induced defect-rich cobalt oxide nanoparticles for electrochemical oxygen evolution reaction, *ChemSusChem*. (2020). <https://doi.org/10.1002/cssc.201903186>.
- [8] G. Yang, B. Zhu, D. Gao, Y. Fu, J. Zhao, J. Li, A  $Co_3O_4/MnCO_3$  heterojunction on three-dimensional nickel foam for an enhanced oxygen evolution reaction, *CrystEngComm*. (2020). <https://doi.org/10.1039/d0ce00325e>.
- [9] D. Huang, J. Yu, Z. Zhang, C. Engtrakul, A. Burrell, M. Zhou, H. Luo, R.C. Tenent,

- Enhancing the Electrocatalysis of  $\text{LiNi}_{0.5}\text{Co}_{0.2}\text{Mn}_{0.3}\text{O}_2$  by introducing lithium deficiency for oxygen evolution reaction, *ACS Appl. Mater. Interfaces.* (2020). <https://doi.org/10.1021/acsami.9b22438>.
- [10] Z. Chen, Z. Hu, D. Zhu, Z. Feng, X. Li, J. Huang, X. Shen, Construction of hierarchical Mn–CoO@Fe(OH)<sub>3</sub> nanofiber array for oxygen evolution reaction, *J. Alloys Compd.* (2020). <https://doi.org/10.1016/j.jallcom.2020.155560>.
- [11] J. Chen, H. Li, Z. Pei, Q. Huang, Z. Yuan, C. Wang, X. Liao, G. Henkelman, Y. Chen, L. Wei, Catalytic activity atlas of ternary Co–Fe–V metal oxides for the oxygen evolution reaction, *J. Mater. Chem. A.* (2020). <https://doi.org/10.1039/d0ta04088f>.
- [12] M. Ishizaki, H. Fujii, K. Toshima, H. Tanno, H. Sutoh, M. Kurihara, Preparation of Co-Fe oxides immobilized on carbon paper using water-dispersible Prussian-blue analog nanoparticles and their oxygen evolution reaction (OER) catalytic activities, *Inorganica Chim. Acta.* (2020). <https://doi.org/10.1016/j.ica.2019.119345>.
- [13] E. Budiyanto, M. Yu, M. Chen, S. DeBeer, O. Rüdiger, H. Tüysüz, Tailoring morphology and electronic structure of cobalt iron oxide nanowires for electrochemical oxygen evolution reaction, *ACS Appl. Energy Mater.* (2020). <https://doi.org/10.1021/acsaem.0c01201>.
- [14] B. Fei, Z. Chen, Y. Ha, R. Wang, H. Yang, H. Xu, R. Wu, Anion-cation co-substitution activation of spinel  $\text{CoMoO}_4$  for efficient oxygen evolution reaction, *Chem. Eng. J.* (2020). <https://doi.org/10.1016/j.cej.2020.124926>.
- [15] X. Gu, H. Jing, X. Mu, H. Yang, Q. Zhou, S. Yan, S. Liu, C. Chen, La-triggered synthesis of oxygen vacancy-modified cobalt oxide nanosheets for highly efficient oxygen evolution

- in alkaline media, *J. Alloys Compd.* (2020).  
<https://doi.org/10.1016/j.jallcom.2019.152274>.
- [16] F. Chen, Y. Cao, D. Jia, A facile route for the synthesis of ZnS rods with excellent photocatalytic activity, *Chem. Eng. J.* 234 (2013) 223–231.  
<https://doi.org/10.1016/j.cej.2013.08.075>.
- [17] S.A. Hosseini, A. Niaei, D. Salari, S.R. Nabavi, Nanocrystalline  $AMn_2O_4$  ( A = Co , Ni , Cu ) spinels for remediation of volatile organic compounds — synthesis , characterization and catalytic performance, *Ceram. Int.* 38 (2012) 1655–1661.  
<https://doi.org/10.1016/j.ceramint.2011.09.057>.
